# Supplementary material
Source: PubMed Central journal article supplement (PMC7489363)
Supplement: NIHMS1621869-supplement-Supplemental_Material.pdf [file NIHMS1621869-supplement-Supplemental_Material.pdf]

## SUPPLEMENTAL MATERIAL

### Navarese EP et al. Comparative efficacy and safety of oral P2Y12 inhibitors in acute coronary syndrome: Network meta-analysis of 52,816 patients from 12 randomized trials. *Circulation* 2020.

|                                                                                                   |    |
|---------------------------------------------------------------------------------------------------|----|
| Figure IA. PRISMA Flow Diagram.....                                                               | 2  |
| Figure IB. Network of treatment comparisons.....                                                  | 3  |
| Figure IIA. Network meta-analysis of randomized trials for all-cause mortality.....               | 4  |
| Figure IIB. Pairwise meta-analysis of randomized trials for all-cause mortality.....              | 5  |
| Figure IIC. Network meta-analysis of randomized trials for non-cardiovascular mortality.....      | 6  |
| Figure IID. Pairwise meta-analysis of randomized trials for non-cardiovascular mortality.....     | 7  |
| Figure IIIA. Network meta-analysis of randomized trials for definite stent thrombosis.....        | 8  |
| Figure IIIB. Pairwise meta-analysis of randomized trials for definite stent thrombosis.....       | 9  |
| Figure IVA. Network meta-analysis of randomized trials for stroke.....                            | 10 |
| Figure IVB. Pairwise meta-analysis of randomized trials for stroke.....                           | 11 |
| Figure VA. Network meta-analysis of randomized trials for hemorrhagic stroke.....                 | 12 |
| Figure VB. Network meta-analysis for ischemic stroke.....                                         | 13 |
| Figure VIA. Pairwise meta-analysis of randomized trials for PLATO major bleeding.....             | 14 |
| Figure VIB. Pairwise meta-analysis of randomized trials for TIMI major bleeding.....              | 15 |
| Figure VIIA. Trials with planned invasive evaluation - Cardiovascular mortality.....              | 16 |
| Figure VIIB. Trials with planned invasive evaluation - All-cause mortality.....                   | 17 |
| Figure VIIC. Trials with planned invasive evaluation - Myocardial infarction.....                 | 18 |
| Figure VIID. Trials with planned invasive evaluation - Definite or probable stent thrombosis..... | 19 |
| Figure VIIE. Trials with planned invasive evaluation - Definite stent thrombosis.....             | 20 |
| Figure VIIF. Trials with planned invasive evaluation – Stroke.....                                | 21 |
| Figure VIIG. Trials with planned invasive evaluation - Major bleeding.....                        | 22 |
| Figure VIII. Rankogram of antithrombotics for efficacy and safety.....                            | 23 |
| Table I. Electronic search using MEDLINE database.....                                            | 24 |
| Table II. Assessment of Consistency of Network Meta-Analysis Model.....                           | 25 |
| Table III. Egger’s regression test.....                                                           | 26 |
| Table IV. Patient characteristics.....                                                            | 27 |
| Table V. Bias assessment.....                                                                     | 29 |
| Table VI. Exclusion of Trials with open-label design.....                                         | 30 |

Figure IA. PRISMA Flow Diagram

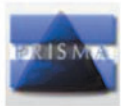

### PRISMA 2009 Flow Diagram

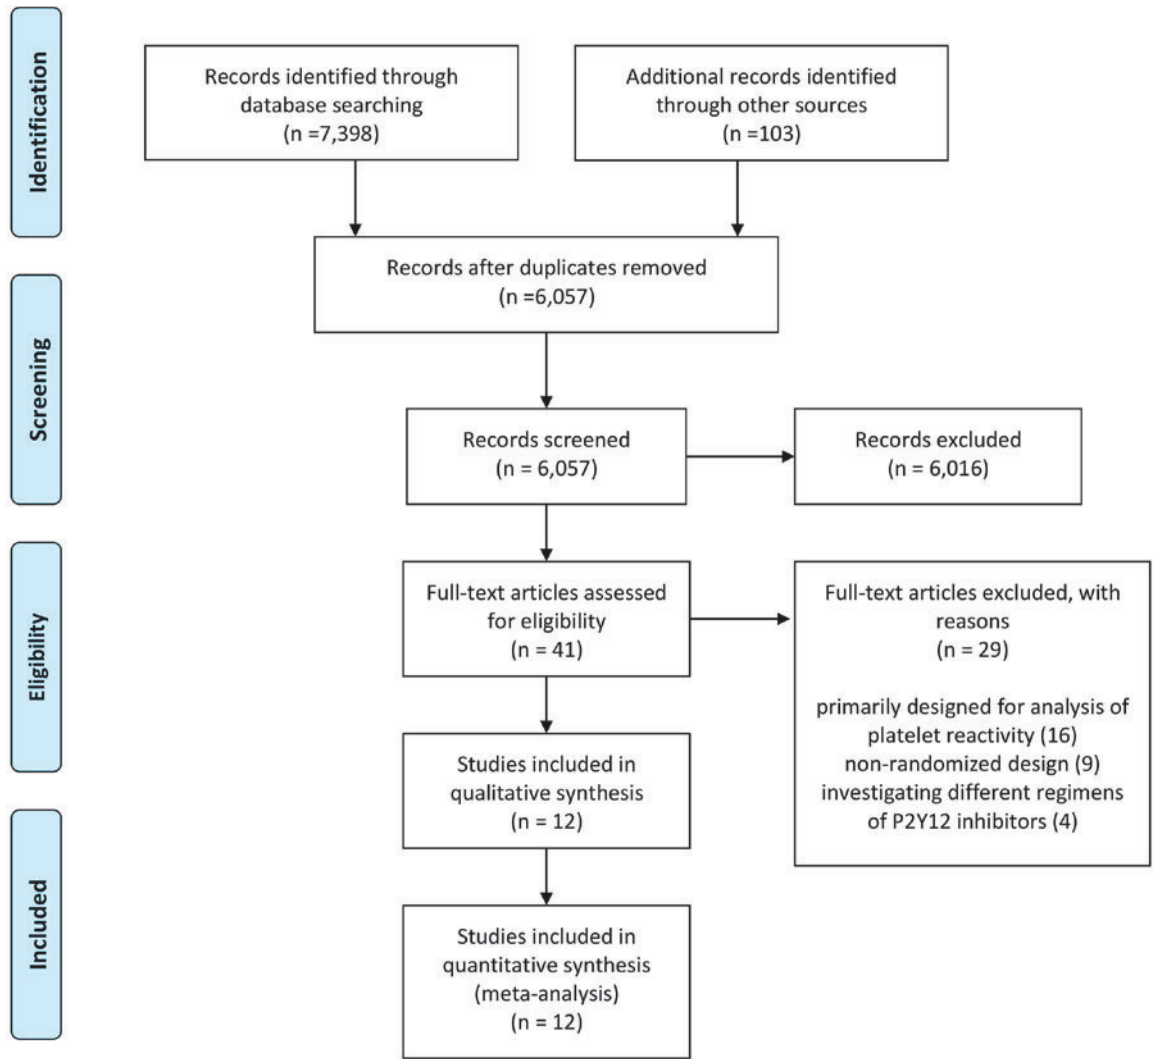

Figure 1B. Network of treatment comparisons.

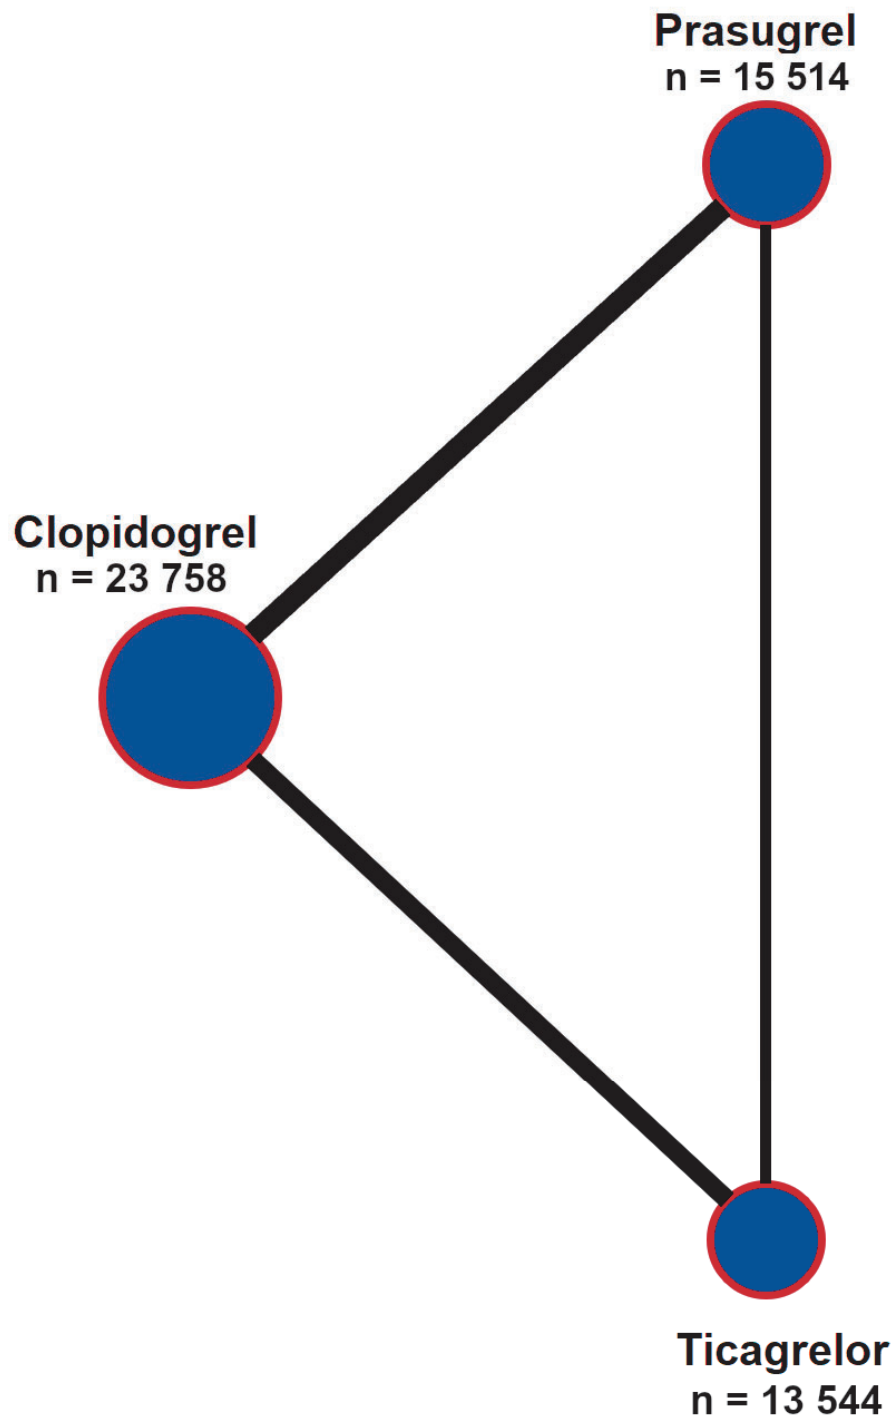

Nodes denote P2Y12 inhibitor type; thickness of link indicates number of direct comparisons

Figure IIA. Network meta-analysis of randomized trials for all-cause mortality.  
 Pooled hazard ratios (HRs) and 95% confidence intervals (CIs) determined by network meta-analysis.

|                            |       |
|----------------------------|-------|
| No. of Trials              | 12    |
| No. of Pairwise comparison | 12    |
| $I^2$                      | 21.7% |

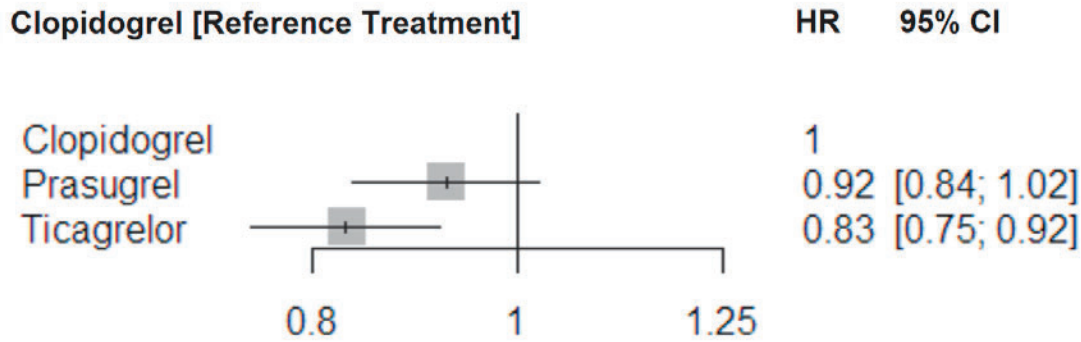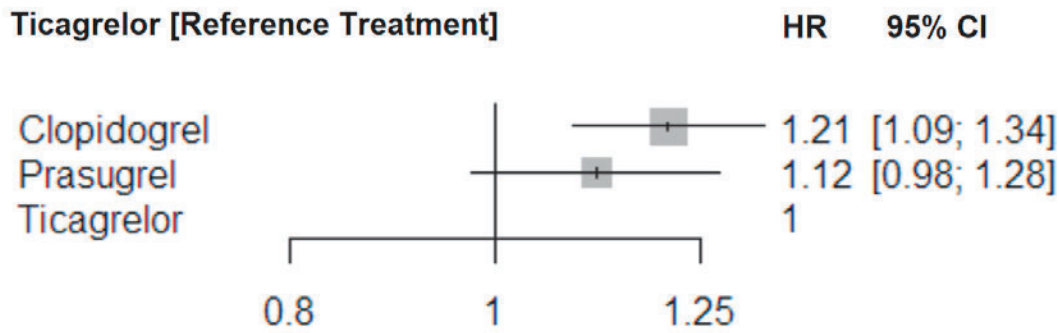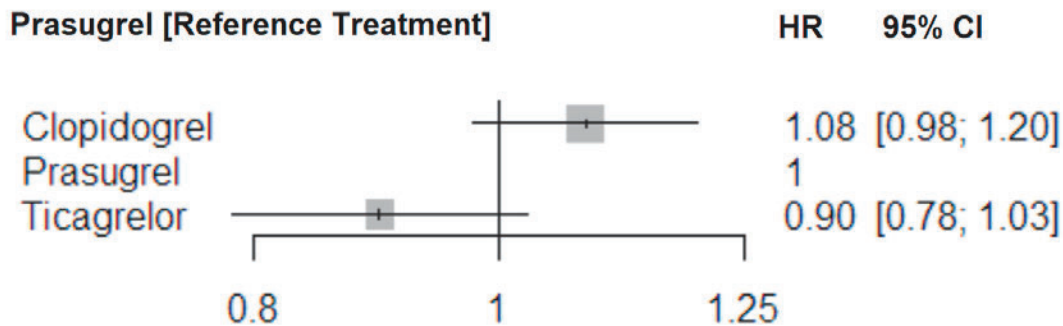

Figure IIB. Pairwise meta-analysis of randomized trials for all-cause mortality.

Individual and summary hazard ratios with 95% confidence intervals(CIs). ISAR-REACT 5 – Ticagrelor or Prasugrel in Patients with Acute Coronary Syndromes, PHILO – Phase the International Study of Ticagrelor and Clinical Outcomes in Asian ACS Patients, PLATO – PLATelet inhibition and patient Outcomes, PRASFIT-ACS – PRASugrel compared with clopidogrel For Japanese patIenTs with ACS undergoing PCI, TICAKOREA – Ticagrelor Versus Clopidogrel in Asian/Korean Patients with ACS Intended for Invasive Management, TRILOGY ACS – The Targeted Platelet Inhibition to Clarify the Optimal Strategy to Medically Manage Acute Coronary Syndromes, TRITON–TIMI 38 – Trial to Assess Improvement in Therapeutic Outcomes by Optimizing Platelet Inhibition with Prasugrel–Thrombolysis in Myocardial Infarction 38.

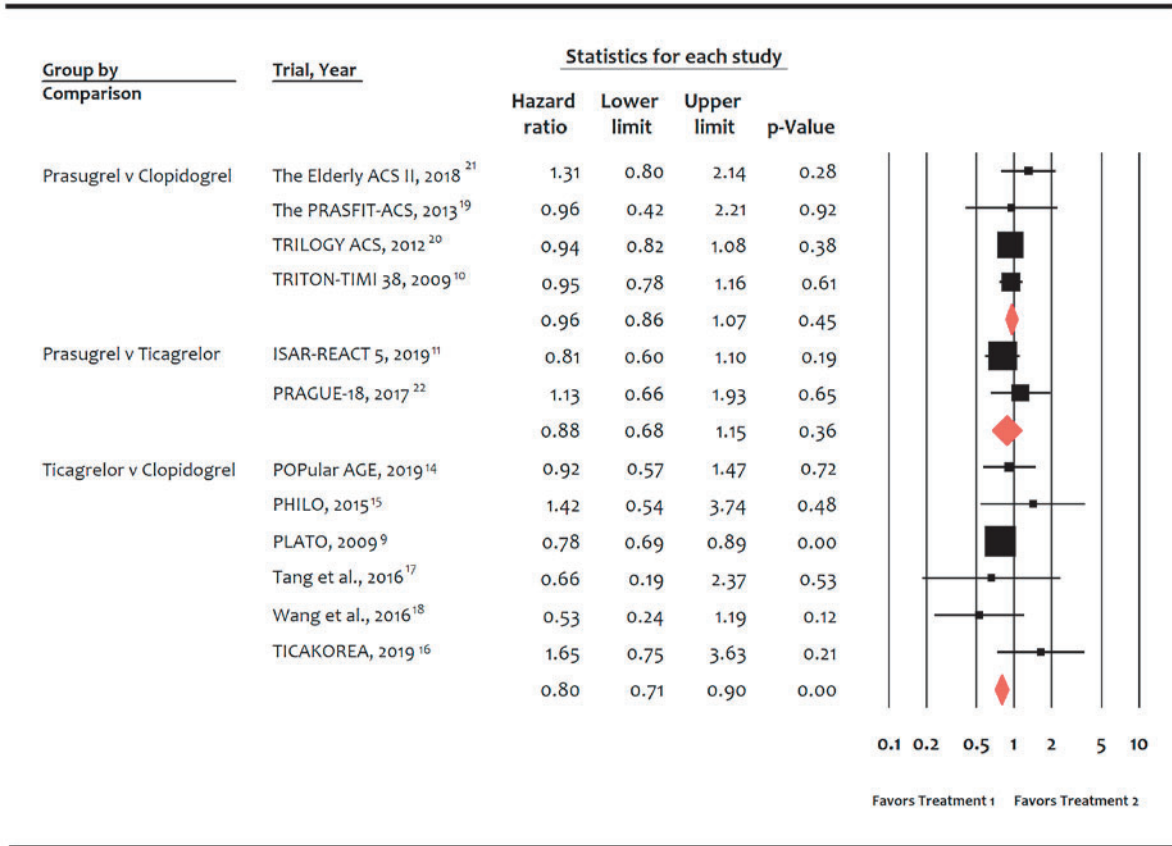

Figure IIC. Network meta-analysis of randomized trials for non-cardiovascular mortality. Pooled hazard ratios (HRs) and 95% confidence intervals (CIs) determined by network meta-analysis.

|                            |       |
|----------------------------|-------|
| No. of Trials              | 11    |
| No. of Pairwise comparison | 11    |
| $I^2$                      | 35.5% |

**Clopidogrel [Reference Treatment]**

**HR 95% CI**

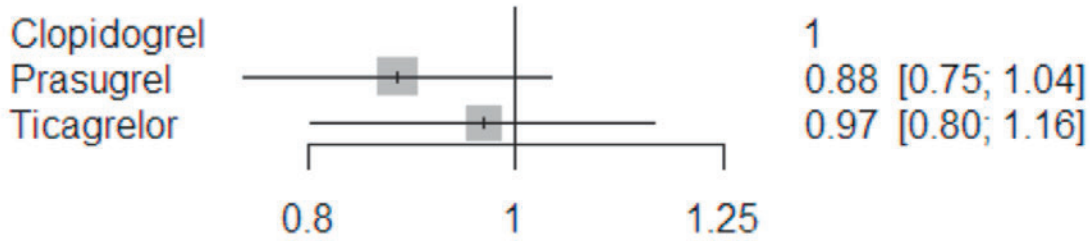

**Ticagrelor [Reference Treatment]**

**HR 95% CI**

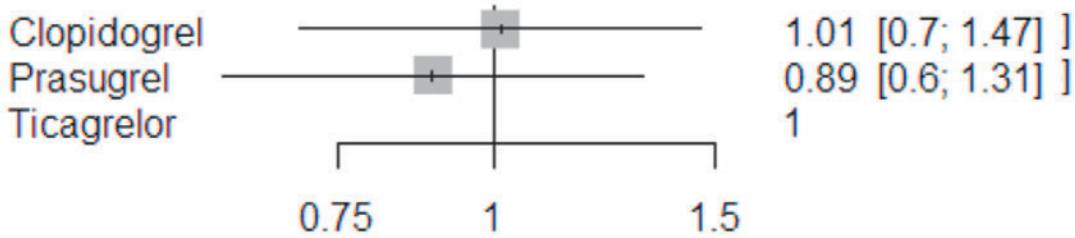

**Prasugrel [Reference Treatment]**

**HR 95% CI**

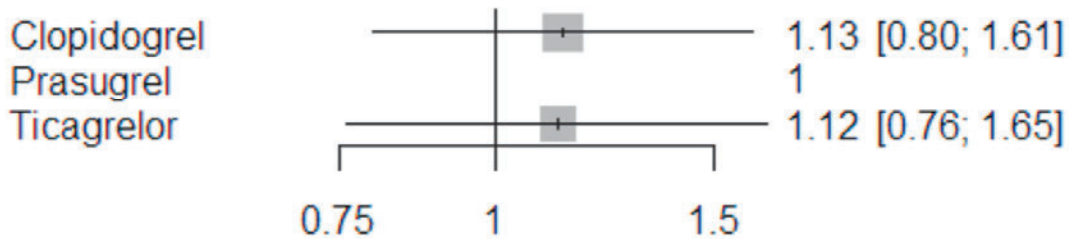

Figure IID. Pairwise meta-analysis of randomized trials for non-cardiovascular mortality. Individual and summary hazard ratios with 95% confidence intervals (CIs).

ISAR-REACT 5 – Ticagrelor or Prasugrel in Patients with Acute Coronary Syndromes, PHILO – Phase the International Study of Ticagrelor and Clinical Outcomes in Asian ACS Patients, PLATO – PLATElet inhibition and patient Outcomes, TICAKOREA – Ticagrelor Versus Clopidogrel in Asian/Korean Patients with ACS Intended for Invasive Management, TRILOGY ACS – The Targeted Platelet Inhibition to Clarify the Optimal Strategy to Medically Manage Acute Coronary Syndromes, TRITON–TIMI 38 – Trial to Assess Improvement in Therapeutic Outcomes by Optimizing Platelet Inhibition with Prasugrel–Thrombolysis in Myocardial Infarction 38.

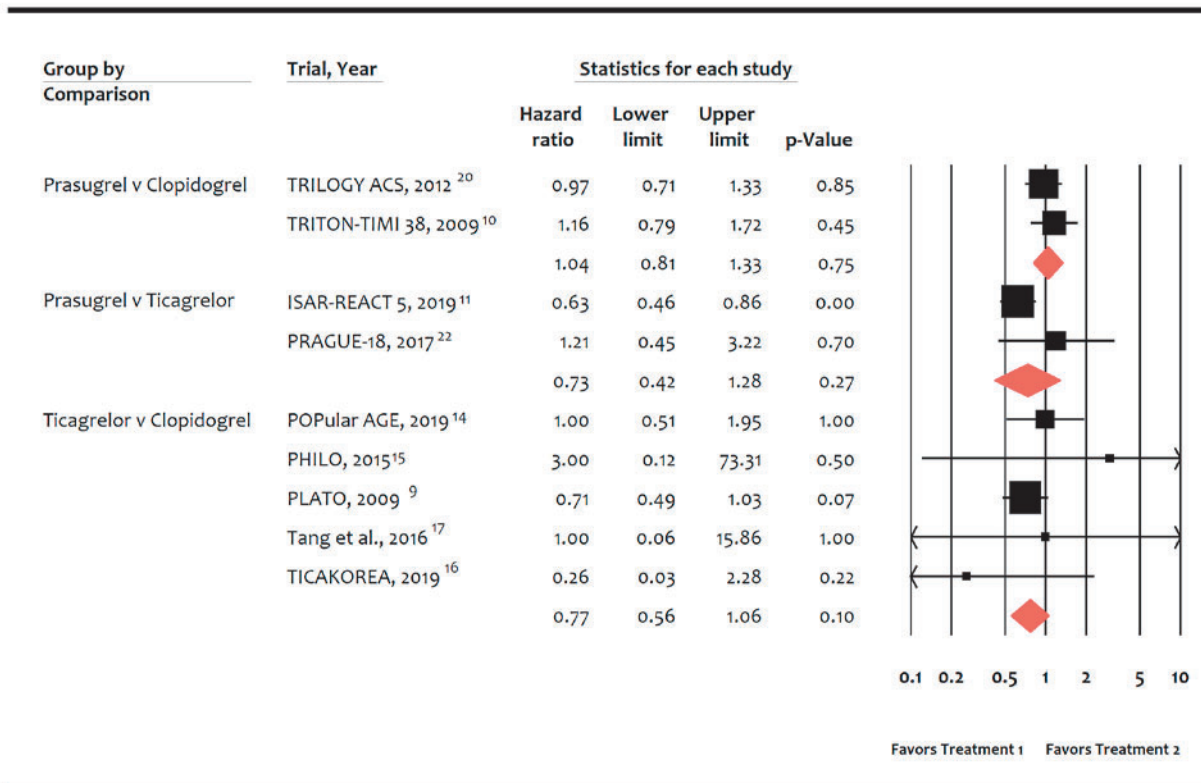

Figure IIIA. Network meta-analysis of randomized trials for definite stent thrombosis.  
 Pooled hazard ratios (HRs) and 95% confidence intervals (CIs) determined by network meta-analysis.

|                            |    |
|----------------------------|----|
| No. of Trials              | 4  |
| No. of Pairwise comparison | 4  |
| $I^2$                      | 0% |

**Clopidogrel [Reference Treatment]**

**HR 95% CI**

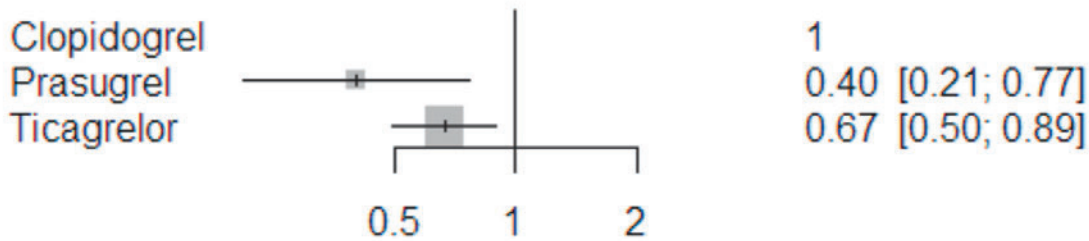

**Ticagrelor [Reference Treatment]**

**HR 95% CI**

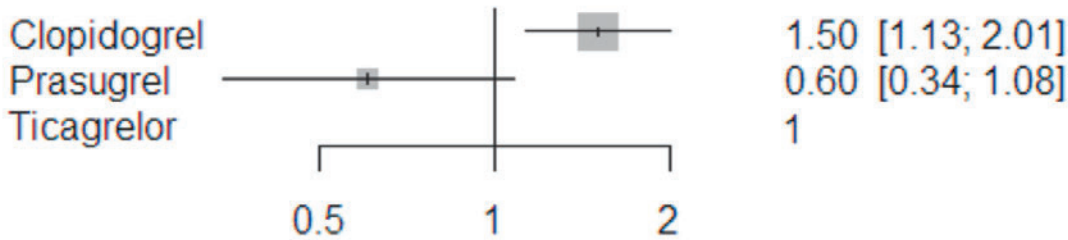

**Prasugrel [Reference Treatment]**

**HR 95% CI**

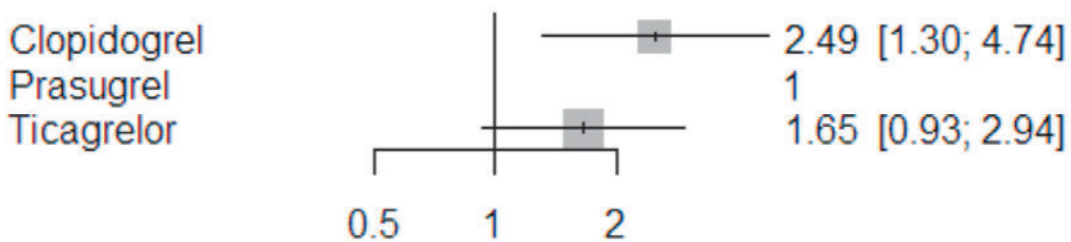



Figure IIIB. Pairwise meta-analysis of randomized trials for definite stent thrombosis. Individual and summary hazard ratios with 95% confidence intervals (CIs). ISAR-REACT 5 – Ticagrelor or Prasugrel in Patients with Acute Coronary Syndromes, PLATO – PLATelet inhibition and patient Outcomes, TICAkOREA – Ticagrelor Versus Clopidogrel in Asian/Korean Patients with ACS Intended for Invasive Management.

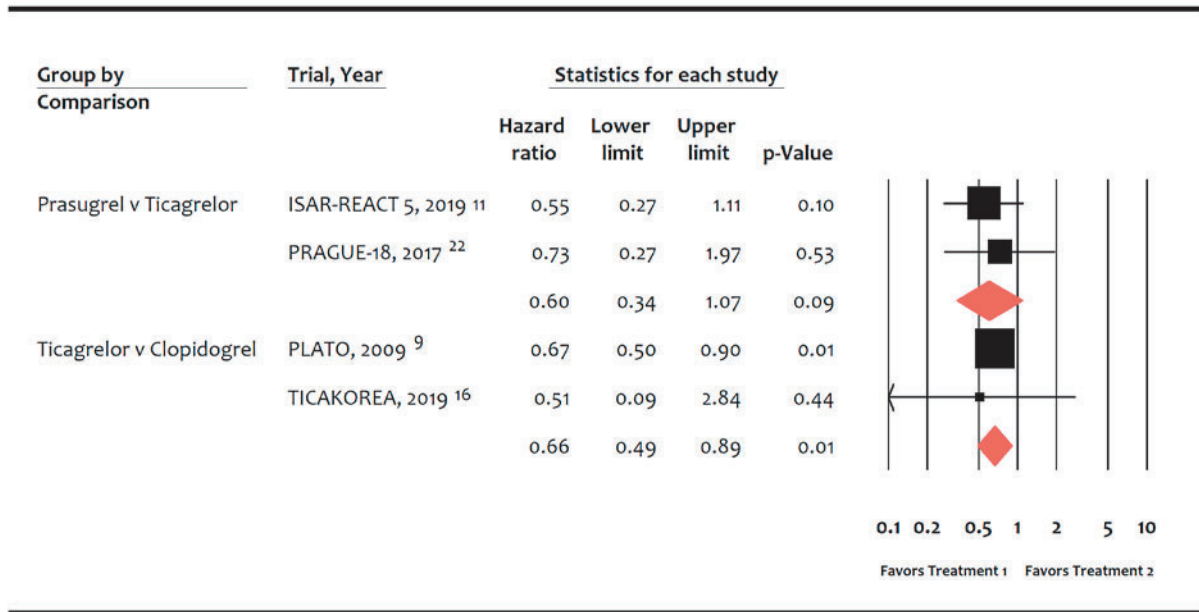

Figure IVA. Network meta-analysis of randomized trials for stroke.  
 Pooled hazard ratios (HRs) and 95% confidence intervals (CIs) determined by network meta-analysis.

|                            |    |
|----------------------------|----|
| No. of Trials              | 11 |
| No. of Pairwise comparison | 11 |
| $I^2$                      | 0% |

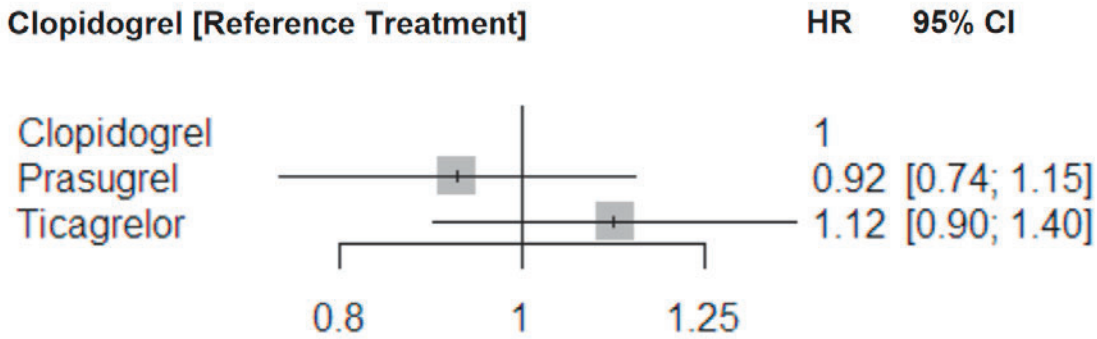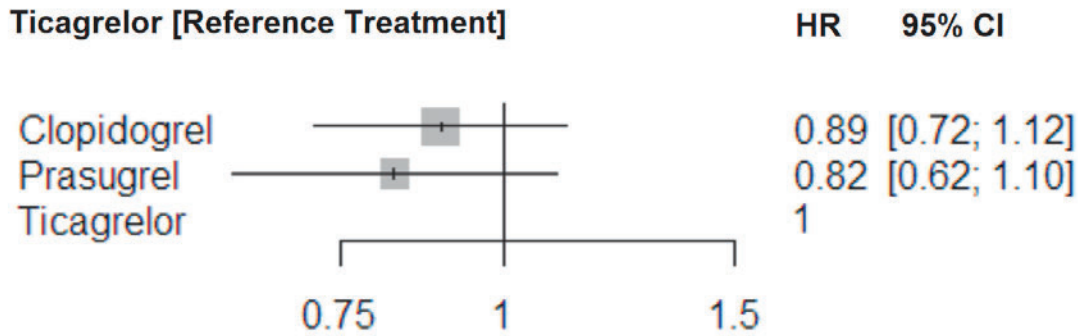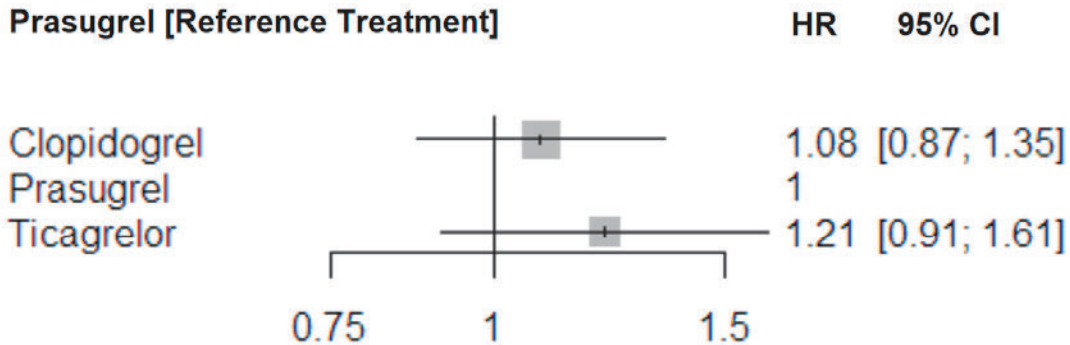

Figure IVB. Pairwise meta-analysis of randomized trials for stroke.

Individual and summary hazard ratios with 95% confidence intervals (CIs). ISAR-REACT 5 – Ticagrelor or Prasugrel in Patients with Acute Coronary Syndromes, PHILO – Phase the International Study of Ticagrelor and Clinical Outcomes in Asian ACS Patients, PLATO – PLATelet inhibition and patient Outcomes, PRASFIT-ACS – PRASugrel compared with clopidogrel For Japanese patIenTs with ACS undergoing PCI, TICAKOREA – Ticagrelor Versus Clopidogrel in Asian/Korean Patients with ACS Intended for Invasive Management, TRILOGY ACS – The Targeted Platelet Inhibition to Clarify the Optimal Strategy to Medically Manage Acute Coronary Syndromes, TRITON–TIMI 38 – Trial to Assess Improvement in Therapeutic Outcomes by Optimizing Platelet Inhibition with Prasugrel–Thrombolysis in Myocardial Infarction 38.

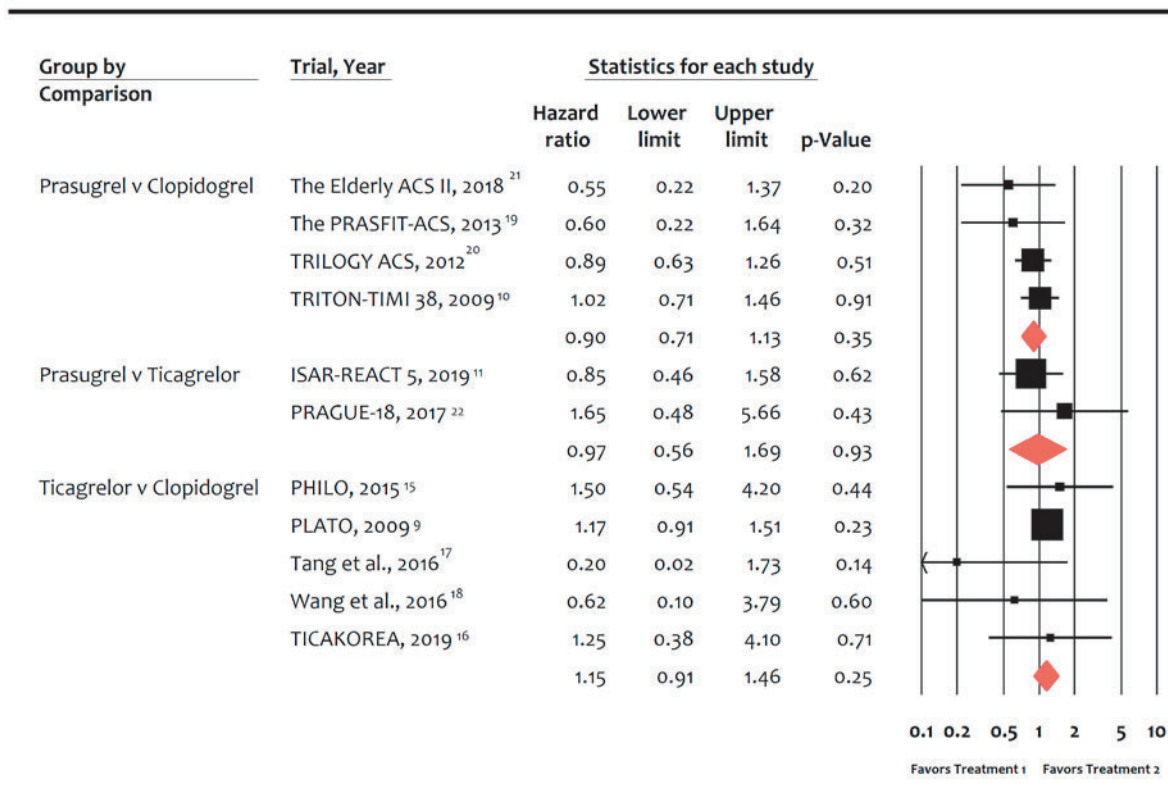

Figure VA. Network meta-analysis of randomized trials for hemorrhagic stroke. Pooled hazard ratios (HRs) and 95% confidence intervals (CIs) determined by network meta-analysis.

|                            |    |
|----------------------------|----|
| No. of Trials              | 4  |
| No. of Pairwise comparison | 4  |
| $I^2$                      | 0% |

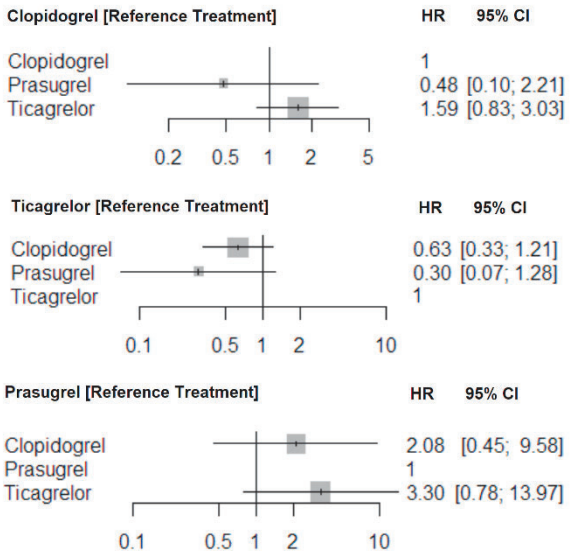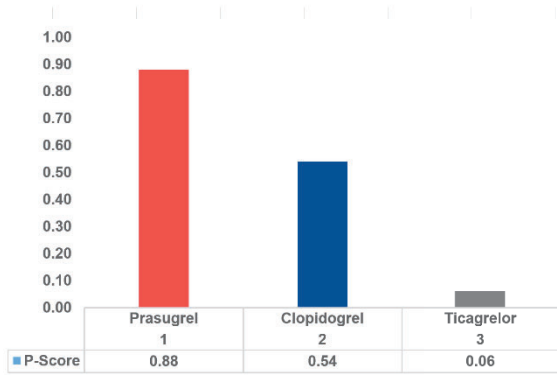

Figure VB. Network meta-analysis for ischemic stroke.

Pooled hazard ratios (HRs) and 95% confidence intervals (CIs) determined by network meta-analysis.

|                            |    |
|----------------------------|----|
| No. of Trials              | 4  |
| No. of Pairwise comparison | 4  |
| $I^2$                      | 0% |

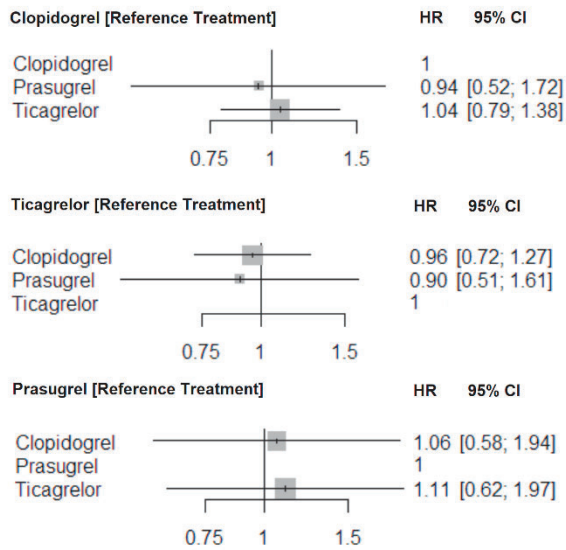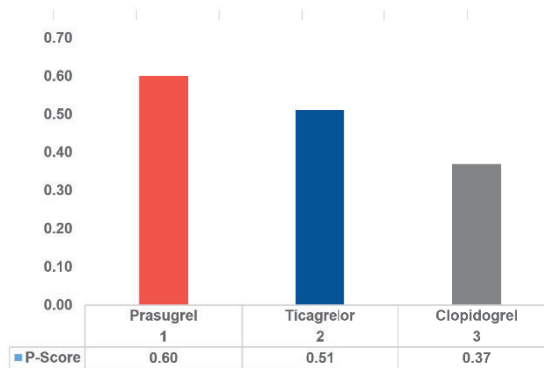

Figure VIA. Pairwise meta-analysis of randomized trials for PLATO major bleeding. Individual and summary hazard ratios with 95% confidence intervals(CIs). PHILO – Phase the International Study of Ticagrelor and Clinical Outcomes in Asian ACS Patients, PLATO – PLATelet inhibition and patient Outcomes, TICAKOREA – Ticagrelor Versus Clopidogrel in Asian/Korean Patients with ACS Intended for Invasive Management.

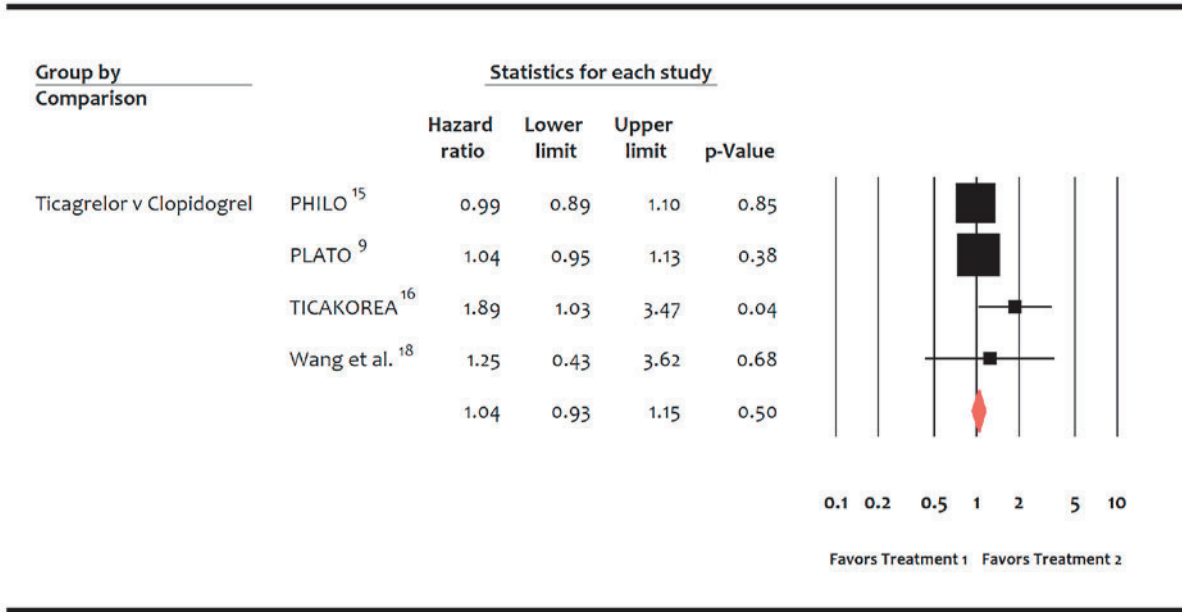

Figure VIB. Pairwise meta-analysis of randomized trials for TIMI major bleeding. Individual and summary hazard ratios with 95% confidence intervals(CIs). TICAkOREA – Ticagrelor Versus Clopidogrel in Asian/Korean Patients with ACS Intended for Invasive Management, TRILOGY ACS – The Targeted Platelet Inhibition to Clarify the Optimal Strategy to Medically Manage Acute Coronary Syndromes, TRITON–TIMI 38 – Trial to Assess Improvement in Therapeutic Outcomes by Optimizing Platelet Inhibition with Prasugrel–Thrombolysis in Myocardial Infarction 38.

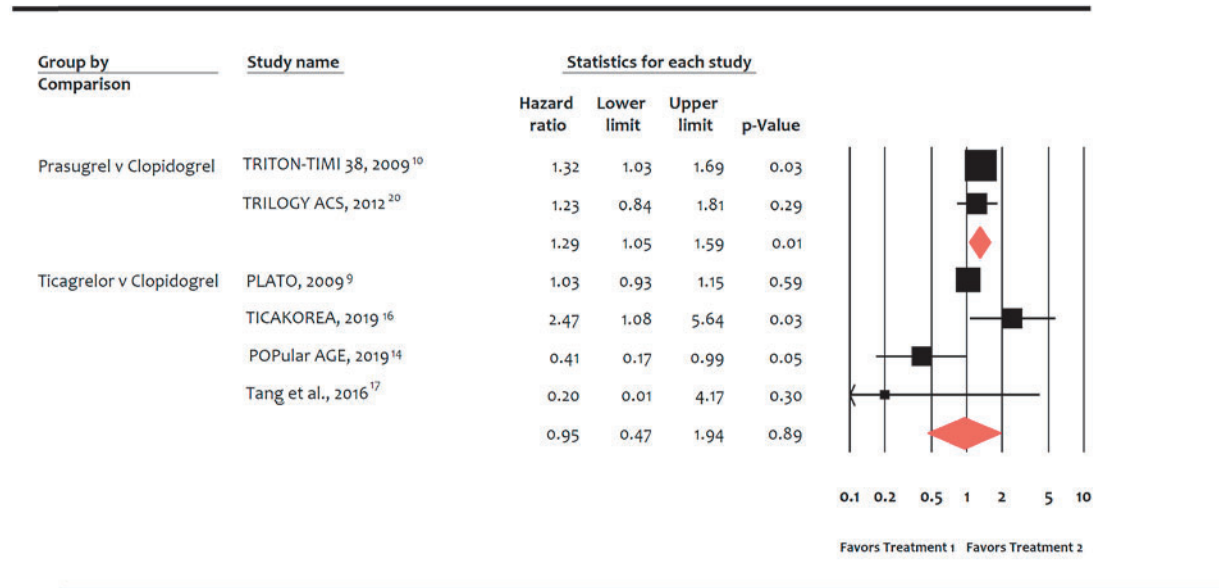

Figure VIIA. Trials with planned invasive evaluation - Cardiovascular mortality.  
 Pooled hazard ratios (HRs) and 95% confidence intervals (CIs) determined by network meta-analysis.

**Clopidogrel [Reference Treatment]**

**HR 95% CI**

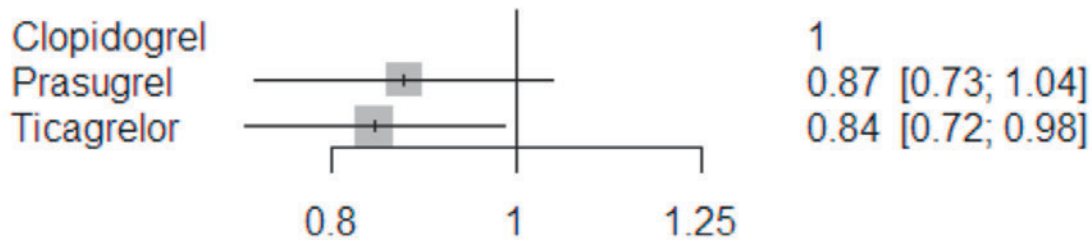

**Ticagrelor [Reference Treatment]**

**HR 95% CI**

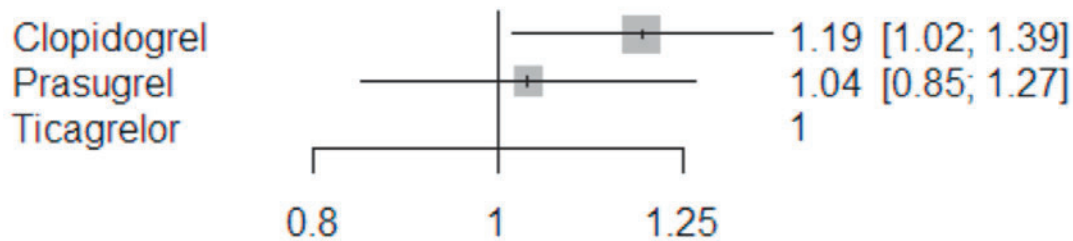

**Prasugrel [Reference Treatment]**

**HR 95% CI**

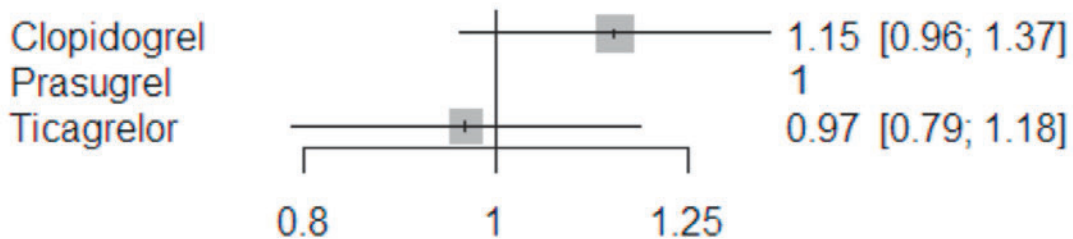



Figure VIIB. Trials with planned invasive evaluation - All-cause mortality.  
 Pooled hazard ratios (HRs) and 95% confidence intervals (CIs) determined by network meta-analysis.

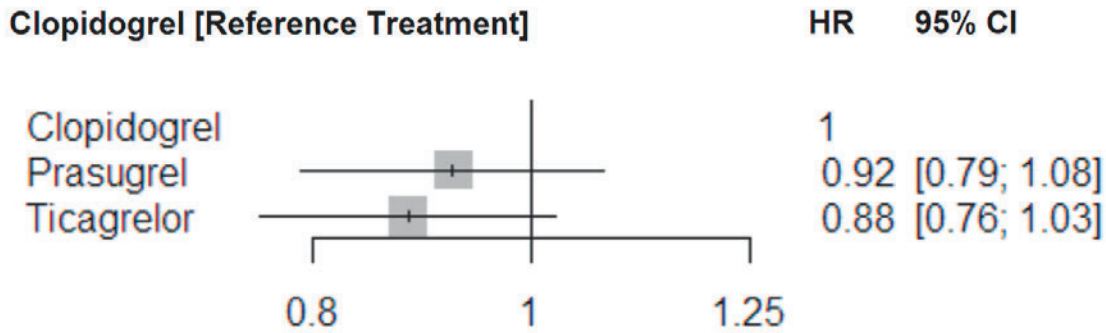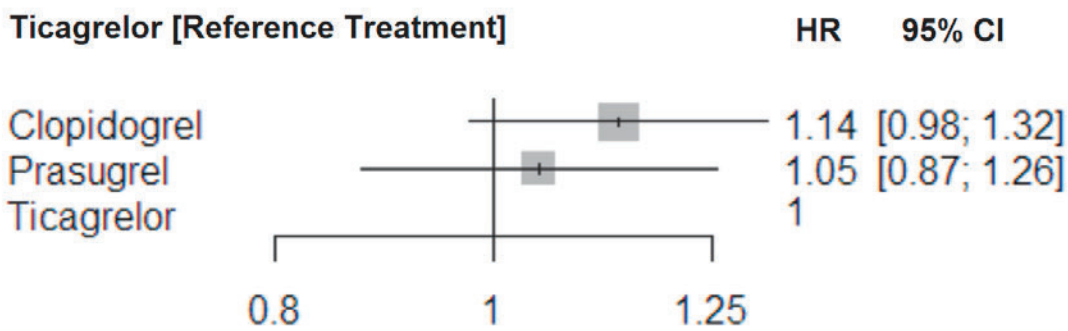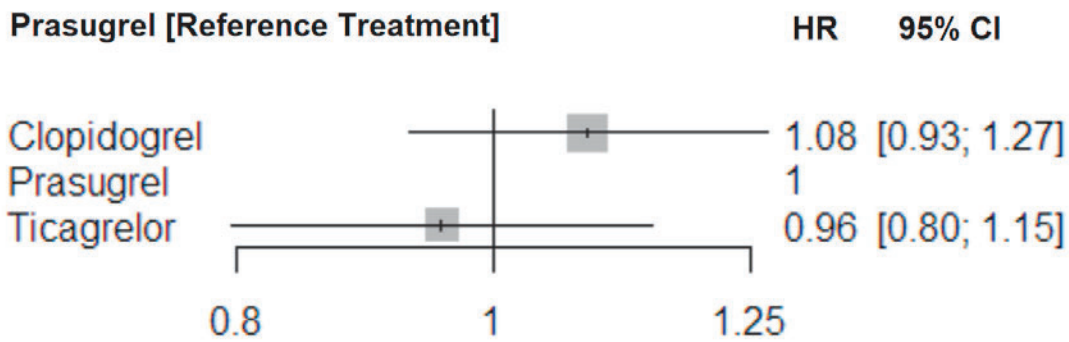

Figure VIIC. Trials with planned invasive evaluation - Myocardial infarction.  
 Pooled hazard ratios (HRs) and 95% confidence intervals (CIs) determined by network meta-analysis.

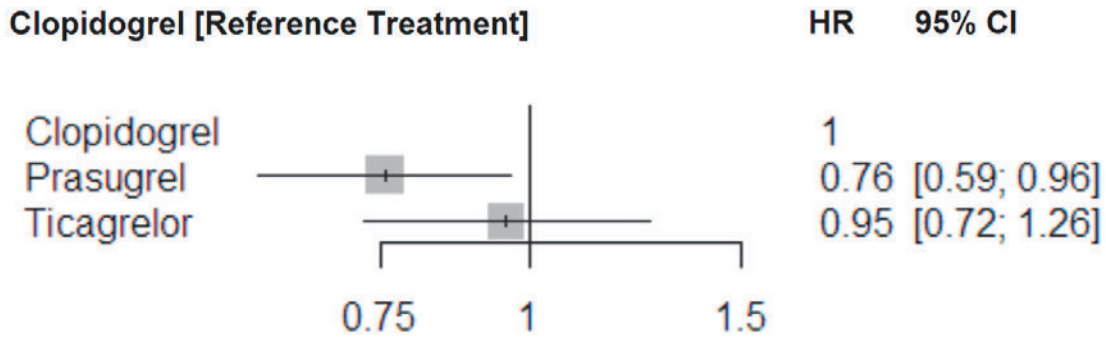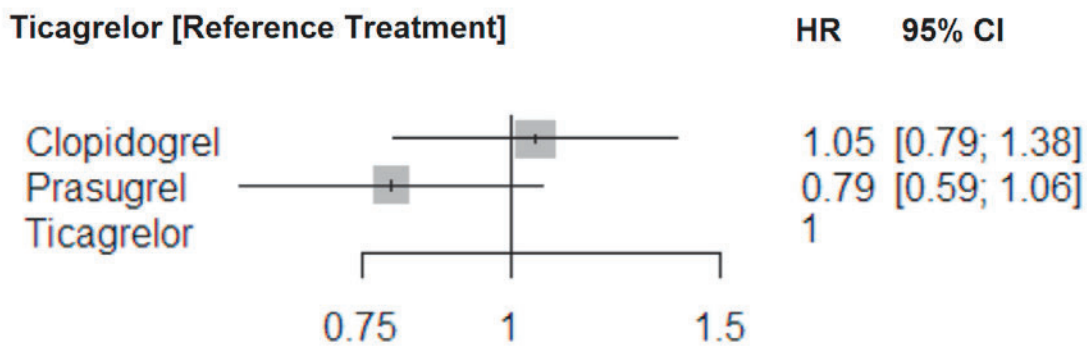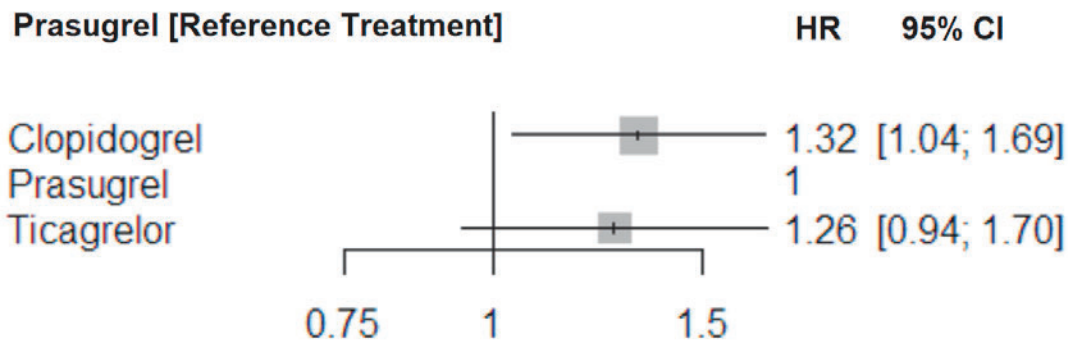

Figure VIID. Trials with planned invasive evaluation - Definite or probable stent thrombosis.  
 Pooled hazard ratios (HRs) and 95% confidence intervals (CIs) determined by network meta-analysis.

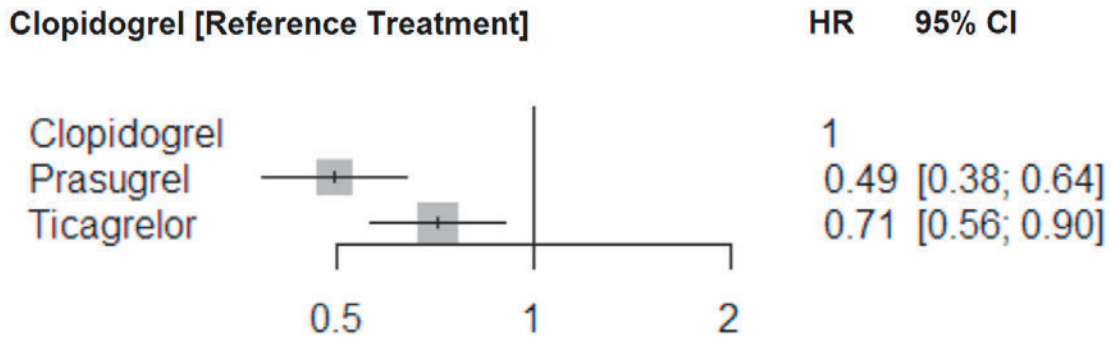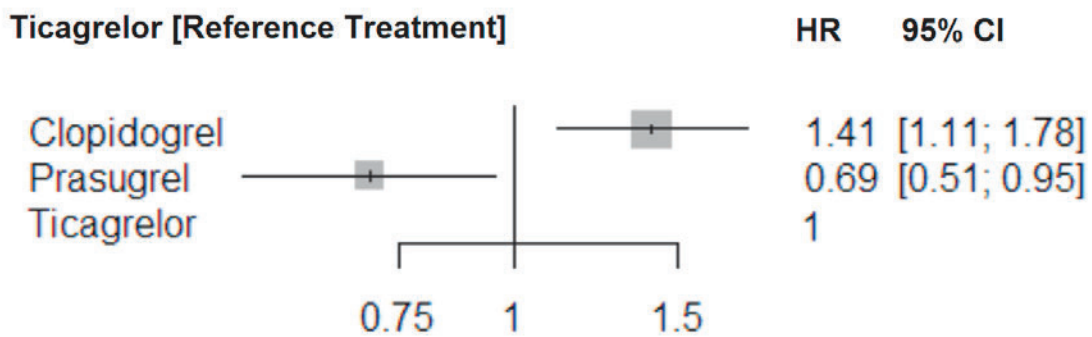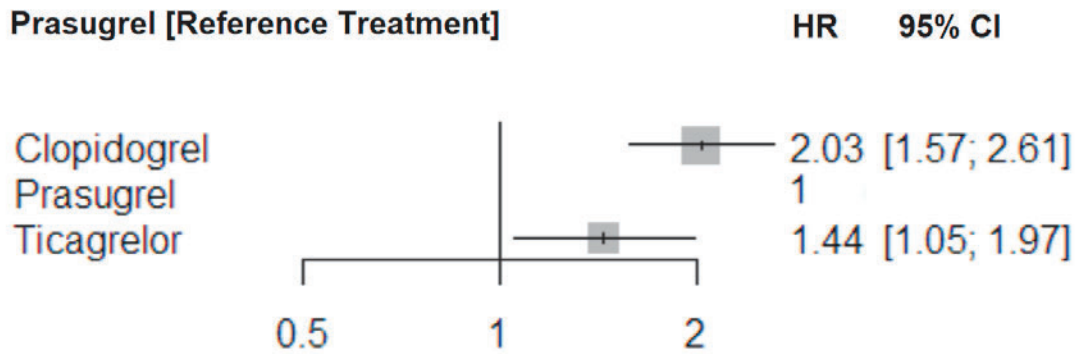

Figure VIIE. Trials with planned invasive evaluation - Definite stent thrombosis.  
 Pooled hazard ratios (HRs) and 95% confidence intervals (CIs) determined by network meta-analysis.

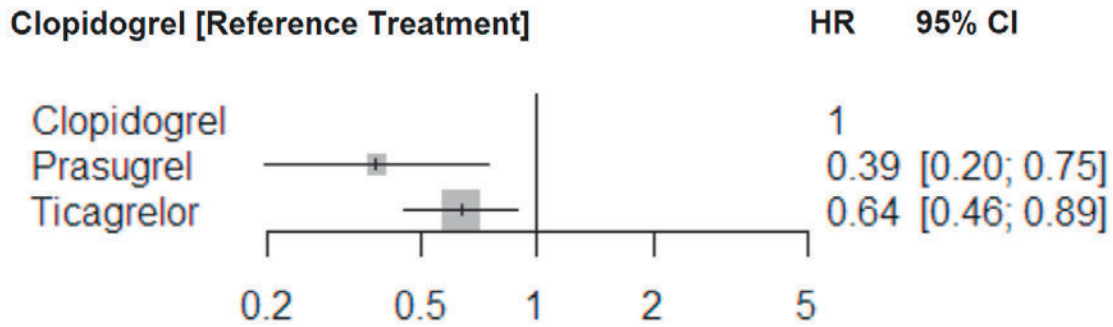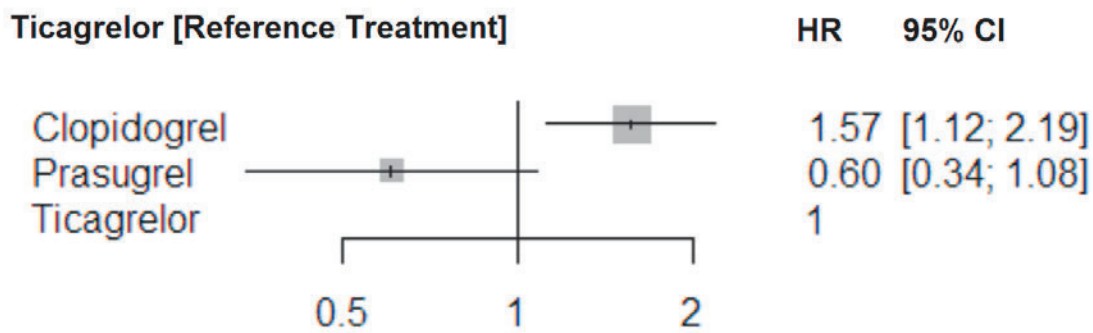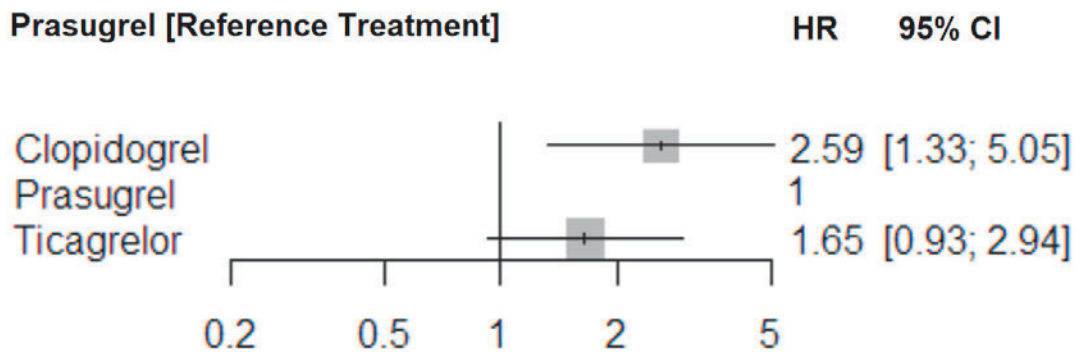

Figure VIIF. Trials with planned invasive evaluation – Stroke.  
 Pooled hazard ratios (HRs) and 95% confidence intervals (CIs) determined by network meta-analysis.

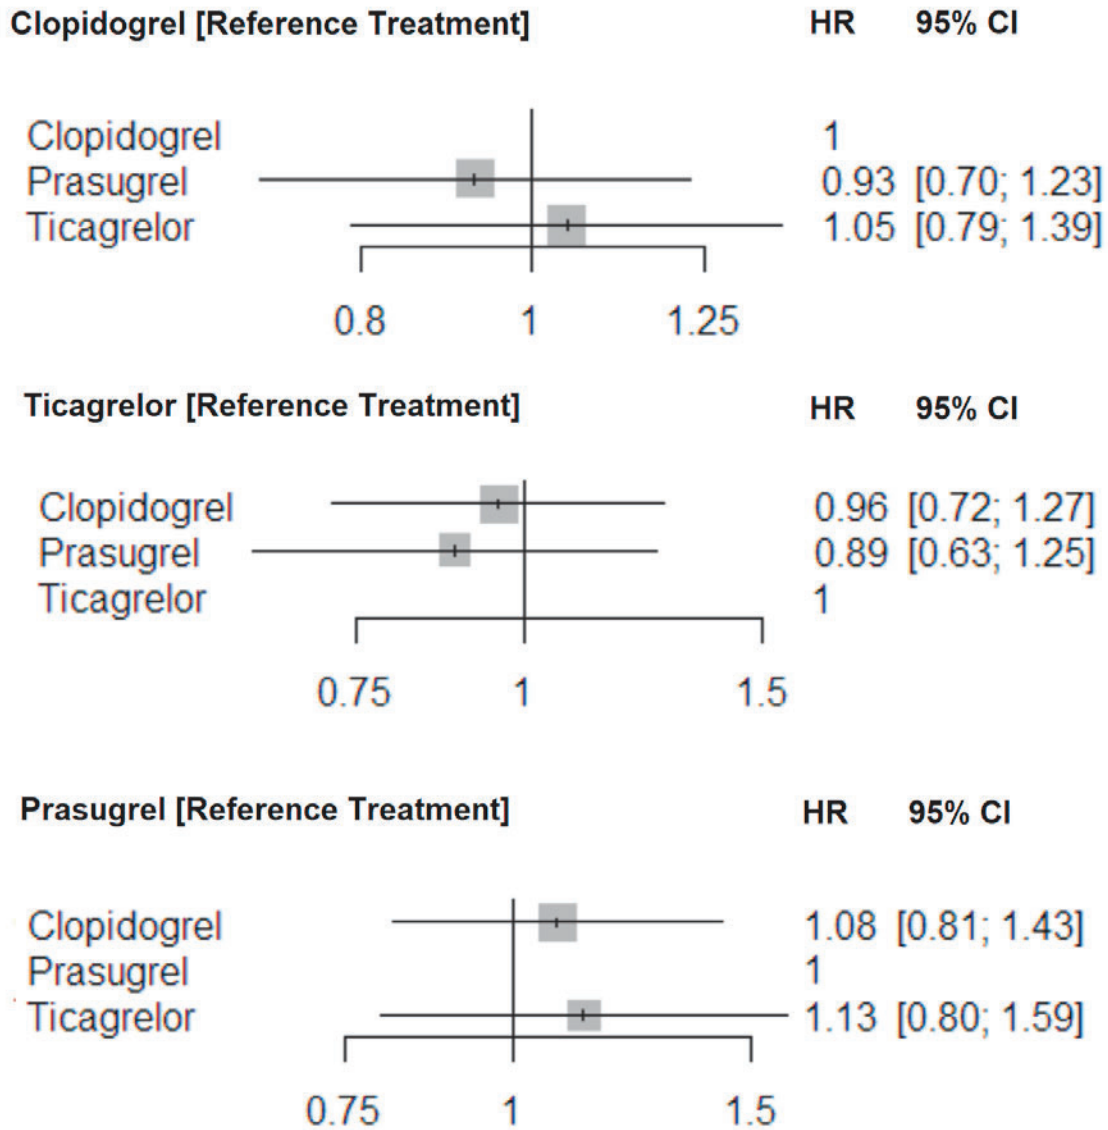

Figure VIIG. Trials with planned invasive evaluation - Major bleeding.  
 Pooled hazard ratios (HRs) and 95% confidence intervals (CIs) determined by network meta-analysis.

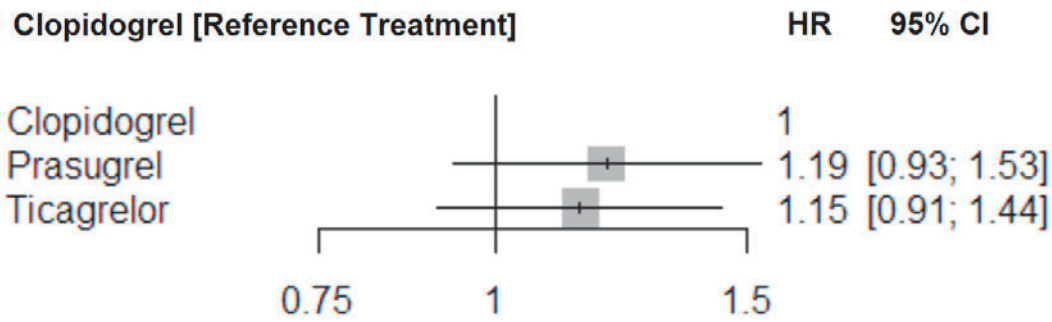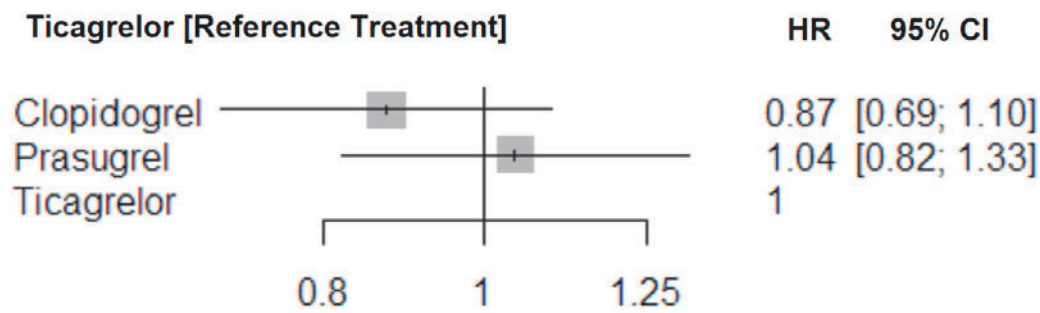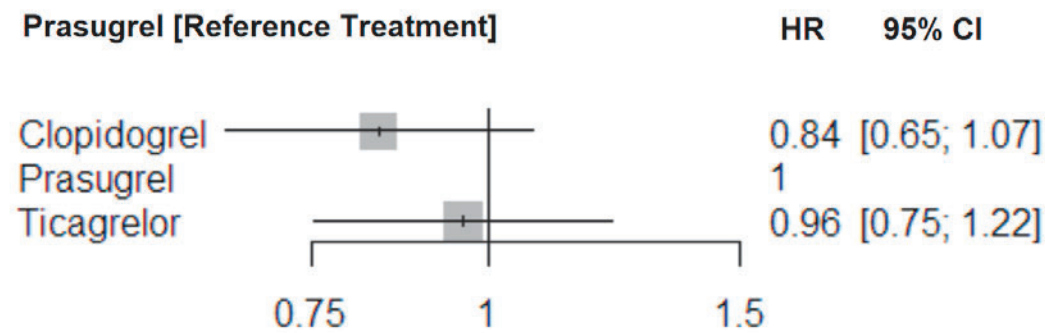

Figure VIII. Rankogram of antithrombotics for efficacy and safety.

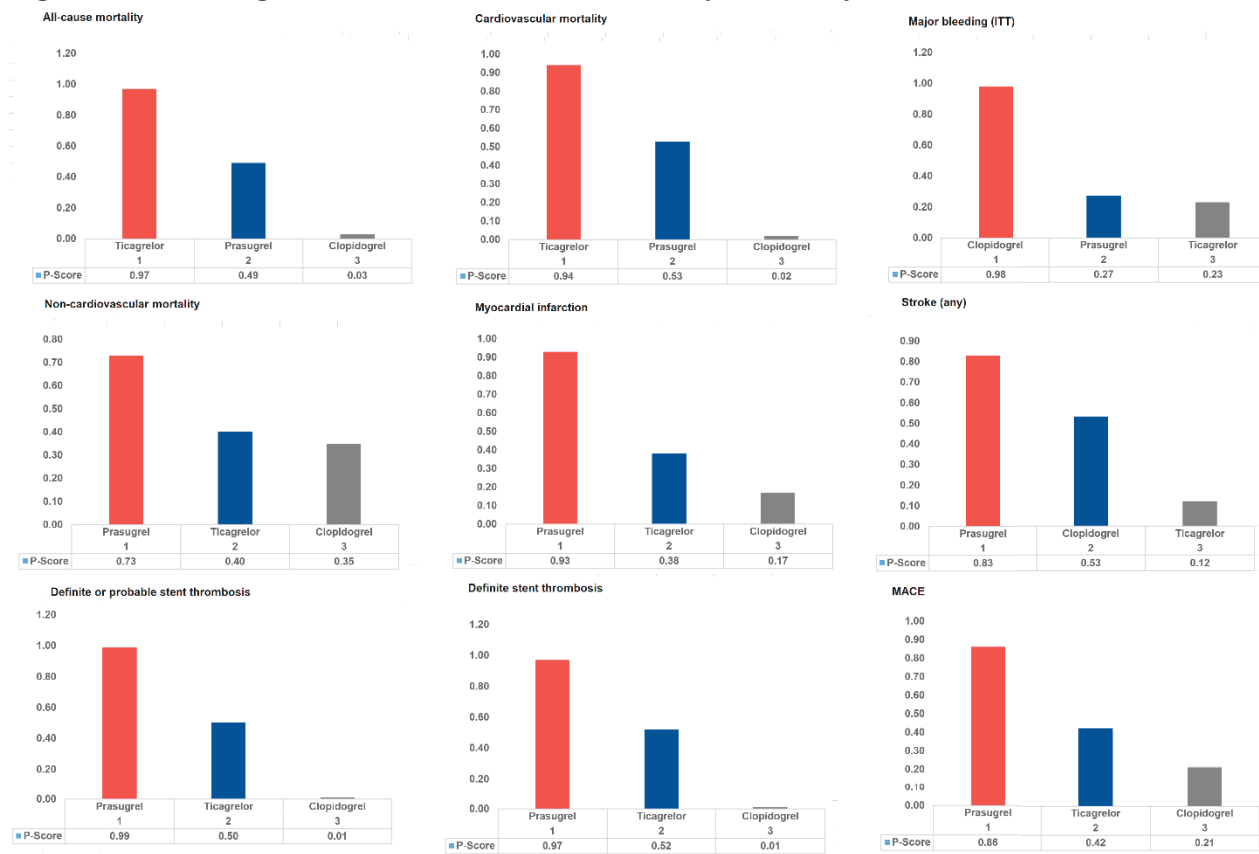

Table I. Electronic search using MEDLINE database.

| Search | Query                                                                                            | Items found |
|--------|--------------------------------------------------------------------------------------------------|-------------|
| #8     | Search <b>((ticagrelor) AND acute coronary syndrome)</b> Filters: <b>Clinical Trial</b>          | 173         |
| #7     | Search <b>((prasugrel) AND acute coronary syndrome)</b> Filters: <b>Clinical Trial</b>           | 171         |
| #6     | Search <b>((clopidogrel) AND randomized controlled trial)</b> Filters: <b>Clinical Trial</b>     | 1586        |
| #5     | Search <b>((prasugrel) AND randomized controlled trial)</b> Filters: <b>Clinical Trial</b>       | 307         |
| #4     | Search <b>((ticagrelor) AND randomized controlled trial)</b> Filters: <b>Clinical Trial</b>      | 361         |
| #3     | Search <b>((p2y12 inhibitor) AND randomized controlled trial)</b> Filters: <b>Clinical Trial</b> | 109         |
| #2     | Search <b>((((ticagrelor) OR prasugrel) OR clopidogrel)</b> Filters: <b>Clinical Trial</b>       | 2279        |
| #1     | Search <b>((clopidogrel) AND acute coronary syndrome)</b> Filters: <b>Clinical Trial</b>         | 473         |



Table II. Assessment of Consistency of Network Meta-Analysis Model

| Comparison                                   | k | Prop | nma  | Direct | Indirect | ROR  | Z     | P-value |
|----------------------------------------------|---|------|------|--------|----------|------|-------|---------|
| <b>All-cause mortality</b>                   |   |      |      |        |          |      |       |         |
| Clopidogrel: Prasugrel                       | 4 | 0.83 | 1.23 | 1.19   | 1.47     | 0.80 | -0.81 | 0.41    |
| Clopidogrel: Ticagrelor                      | 6 | 0.75 | 1.02 | 1.08   | 0.87     | 1.23 | 0.81  | 0.41    |
| Prasugrel: Ticagrelor                        | 2 | 0.42 | 0.83 | 0.73   | 0.90     | 0.80 | -0.81 | 0.41    |
| <b>Cardiovascular mortality</b>              |   |      |      |        |          |      |       |         |
| Clopidogrel: Prasugrel                       | 4 | 0.85 | 1.11 | 1.09   | 1.25     | 0.86 | -0.69 | 0.49    |
| Clopidogrel: Ticagrelor                      | 6 | 0.81 | 1.19 | 1.23   | 1.07     | 1.15 | 0.69  | 0.49    |
| Prasugrel: Ticagrelor                        | 2 | 0.34 | 1.07 | 0.98   | 1.12     | 0.86 | -0.69 | 0.91    |
| <b>Myocardial infarction.</b>                |   |      |      |        |          |      |       |         |
| Clopidogrel: Prasugrel                       | 4 | 0.83 | 1.23 | 1.19   | 1.47     | 0.80 | -0.81 | 0.41    |
| Clopidogrel: Ticagrelor                      | 6 | 0.75 | 1.02 | 1.08   | 0.87     | 1.23 | 0.81  | 0.41    |
| Prasugrel: Ticagrelor                        | 2 | 0.42 | 0.83 | 0.73   | 0.90     | 0.80 | -0.81 | 0.41    |
| <b>Stroke</b>                                |   |      |      |        |          |      |       |         |
| Clopidogrel: Prasugrel                       | 4 | 0.83 | 1.07 | 1.02   | 1.35     | 0.75 | -1.41 | 0.15    |
| Clopidogrel: Ticagrelor                      | 6 | 0.78 | 1.13 | 1.21   | 0.91     | 1.32 | 1.41  | 0.15    |
| Prasugrel: Ticagrelor                        | 2 | 0.39 | 1.06 | 0.89   | 1.18     | 0.75 | -1.41 | 0.15    |
| <b>Definite or probable stent thrombosis</b> |   |      |      |        |          |      |       |         |
| Clopidogrel: Prasugrel                       | 3 | 0.84 | 2.01 | 2.07   | 1.75     | 1.17 | 0.47  | 0.64    |
| Clopidogrel: Ticagrelor                      | 3 | 0.88 | 1.38 | 1.35   | 1.59     | 0.84 | -0.47 | 0.64    |
| Prasugrel: Ticagrelor                        | 1 | 0.28 | 0.68 | 0.77   | 0.65     | 1.17 | 0.47  | 0.64    |
| <b>Definite stent thrombosis</b>             |   |      |      |        |          |      |       |         |
| Clopidogrel: Prasugrel                       | 0 | 0.00 | 2.01 | 2.48   | .        | 0.00 | .     | .       |
| Clopidogrel: Ticagrelor                      | 2 | 0.88 | 1.00 | 1.50   | 1.50     | 1.50 | .     | .       |
| Prasugrel: Ticagrelor                        | 2 | 0.28 | 1.00 | 0.60   | 0.60     | 0.60 | .     | .       |
| <b>Non cardiovascular mortality</b>          |   |      |      |        |          |      |       |         |
| Clopidogrel: Prasugrel                       | 3 | 0.73 | 1.13 | 0.98   | 1.67     | 0.58 | -1.31 | 0.18    |
| Clopidogrel: Ticagrelor                      | 6 | 0.67 | 1.01 | 1.20   | 0.70     | 1.69 | 1.31  | 0.18    |
| Prasugrel: Ticagrelor                        | 2 | 0.60 | 0.89 | 0.71   | 1.22     | 0.58 | -1.31 | 0.18    |
| <b>Major bleeding</b>                        |   |      |      |        |          |      |       |         |
| Clopidogrel: Prasugrel                       | 4 | 0.67 | 0.79 | 0.78   | 0.81     | 0.95 | -0.19 | 0.84    |
| Clopidogrel: Ticagrelor                      | 6 | 0.74 | 0.78 | 0.79   | 0.76     | 1.04 | 0.19  | 0.84    |
| Prasugrel: Ticagrelor                        | 2 | 0.60 | 0.99 | 0.97   | 1.01     | 0.95 | -0.19 | 0.84    |

Comparison = Treatment comparison; k =Number of studies providing direct evidence; prop= Proportion of direct evidence; nma =Estimated treatment effect (HR) in network meta-analysis; direct=Estimated treatment effect (HR) derived from direct evidence; Indirect =Estimated treatment effect (RR) derived from indirect evidence; RoR=Ratio of Ratios (direct versus indirect); z= z-value of test for disagreement (direct versus indirect); p-value=p-value of test for consistency

Table III. Egger's regression test

| <b>Outcome</b>                        | <b>P-value (2-tailed)</b> |
|---------------------------------------|---------------------------|
| All-cause mortality                   | 0.46                      |
| Major bleeding                        | 0.25                      |
| Cardiovascular mortality              | 0.84                      |
| Myocardial infarction                 | 0.99                      |
| Stroke                                | 0.13                      |
| Definite or probable stent thrombosis | 0.33                      |
| Definite stent thrombosis             | 0.80                      |
| MACE                                  | 0.94                      |
| Hemorrhagic stroke                    | 0.32                      |
| Ischemic stroke                       | 0.46                      |
| Non-cardiovascular mortality          | 0.34                      |

Table IV. Patient characteristics.

| Study                                                                                             | Arm                      | Patient characteristics |              |                  |                  |                       |                      |              |              |              |                      |                   |                  |
|---------------------------------------------------------------------------------------------------|--------------------------|-------------------------|--------------|------------------|------------------|-----------------------|----------------------|--------------|--------------|--------------|----------------------|-------------------|------------------|
|                                                                                                   |                          | Age (years)             | Male         | Diabetes         | Current smoker   | Arterial hypertension | Hypercholesterolemia | STEMI        | NSTEMI       | UA or other  | Coronary angiography | PCI               | Medical therapy  |
| [The Elderly ACS II trial] <sup>21</sup><br>Savonitto et al. 2018<br>Circulation<br>[NCT01777503] | prasugrel                | 80                      | 419 (59%)    | 215 (30%)        | 62 (9%)          | 554 (78%)             | 332 (47%)            | 298 (42%)    | 344 (48%)    | 71 (10%)     | 713 (100%)           | 707 (99%)         | 6 (0.8%)         |
|                                                                                                   | clopidogrel              | 80                      | 448 (62%)    | 204 (28%)        | 69 (9%)          | 566 (78%)             | 313 (43%)            | 297 (41%)    | 350 (47%)    | 83 (12%)     | 730 (100%)           | 726 (99.5%)       | 4 (0.5%)         |
| [ISAR-REACT 5] <sup>11</sup><br>Schupke et al. 2019<br>NEJM<br>[NCT01944800]                      | ticagrelor               | 64.5                    | 1534 (76.2%) | 463/2011 (23.0%) | 682/2002 (34.1%) | 1432/2008 (71.3%)     | 1178/2007 (58.7%)    | 833 (41.4%)  | 930 (46.2%)  | 249 (12.4%)  | 2003 (99.6%)         | 1676/2009 (83.4%) | 285/2009 (14.2%) |
|                                                                                                   | prasugrel                | 64.6                    | 1528 (76.2%) | 429/2005 (21.4%) | 667/1999 (33.4%) | 1384/2003 (69.1%)     | 1163/2003 (58.1%)    | 820 (40.9%)  | 925 (46.1%)  | 261 (13.0%)  | 2001 (99.8%)         | 1701/2005 (84.8%) | 268/2005 (13.4%) |
| [PHILO] <sup>15</sup><br>Goto et al. 2015<br>Circulation Journal<br>[NCT01294462]                 | ticagrelor               | 67                      | 306 (76.3%)  | 154 (38.4%)      | 151 (37.7%)      | 305 (76.1%)           | 314 (78.3%)          | 205 (51.1%)  | 66 (16.5%)   | 129 (32.2%)  | 385 (96.0%)          | 340 (84.8%)       | 61 (15.2%)       |
|                                                                                                   | clopidogrel              | 66                      | 307 (76.7%)  | 124 (31.1%)      | 157 (39.3%)      | 290 (72.5%)           | 289 (72.3%)          | 210 (52.5%)  | 74 (18.5%)   | 116 (29.1%)  | 378 (95.4%)          | 338 (84.5%)       | 62 (15.5%)       |
| [PLATO] <sup>9</sup><br>Wallentin et al. 2009<br>NEJM<br>[NCT00391872]                            | ticagrelor               | 62                      | 6678 (71.6%) | 2326 (24.9%)     | 3360 (36.0%)     | 6139 (65.8%)          | 4347 (46.6%)         | 3496 (37.5%) | 4005 (42.9%) | 1832 (19.6%) | 7599 (81.4%)         | 5687 (60.9%)      | 3646 (39.1%)     |
|                                                                                                   | clopidogrel              | 62                      | 6658 (71.7%) | 2336 (25.1%)     | 3318 (35.7%)     | 6044 (65.1%)          | 4342 (46.7%)         | 3530 (38.0%) | 3950 (42.5%) | 1811 (19.5%) | 7571 (81.5%)         | 5676 (61.1%)      | 3615 (38.9%)     |
| [POPular AGE trial] <sup>19</sup><br>Marieke et al. 2019<br>[NCT02317198]                         | clopidogrel              | 77                      | 314 (62.7%)  | 146 (29.1%)      | NA               | NA                    | NA                   | 0            | 423 (84.6%)  | 78 (15.4%)   | 440 (87.8%)          | 238 (47.5%)       | 263 (52.5%)      |
|                                                                                                   | ticagrelor or prasugrel* | 77                      | 325 (64.7%)  | 150 (29.9)       | NA               | NA                    | NA                   | 0            | 421 (83.9%)  | 81 (16.1%)   | 452 (90.0%)          | 245 (48.9%)       | 256 (51%)        |
| [PRAGUE-18] <sup>22</sup><br>Motovska et al. 2017<br>JACC<br>[NCT02808767]                        | prasugrel                | 61.8                    | 489 (77.1%)  | 127 (20.0%)      | 406 (64.0%)      | 326 (51.4%)           | 212 (33.4%)          | 568 (89.6%)  | 33 (5.2%)    | 33 (5.2%)    | 634 (100%)           | 629 (99.2%)       | 5 (0.8%)         |
|                                                                                                   | ticagrelor               | 61.8                    | 439 (73.7%)  | 124 (20.8%)      | 392 (65.8%)      | 305 (51.2%)           | 211 (35.4%)          | 533 (89.4%)  | 34 (5.7%)    | 29 (4.8%)    | 596 (100%)           | 591 (99.2%)       | 5 (0.8%)         |
| [The PRASFIT-ACS] <sup>19</sup><br>Saito et al. 2013<br>Circulation Journal                       | prasugrel                | 65.4                    | 536 (78.2%)  | 250 (36.5%)      | 273 (39.9%)      | 495 (72.3%)           | 516 (75.3%)          | 340 (49.6%)  | 187 (27.3%)  | 156 (22.8)   | 685 (100%)           | NA                | NA               |
|                                                                                                   | clopidogrel              | 65.1                    | 538 (79.4%)  | 237 (35.0%)      | 279 (41.2%)      | 491 (72.4%)           | 500 (73.7%)          | 341 (50.3%)  | 213 (31.4%)  | 124 (18.3)   | 678 (100%)           | NA                | NA               |
| [TICAKOREA] <sup>16</sup><br>Duk-Woo Park et al. 2019<br>Circulation<br>[NCT02094963]             | ticagrelor               | 62.5                    | 297 (74.2%)  | 116 (29%)        | 146 (36.5%)      | 223 (55.8%)           | 208 (52%)            | 170 (42.5%)  | 148 (37%)    | 82 (20.5%)   | 400 (100%)           | 326 (81.5%)       | 63 (15.8%)       |
|                                                                                                   | clopidogrel              | 62.3                    | 302 (75.5%)  | 100 (25%)        | 139 (34.8%)      | 193 (48.2%)           | 194 (48.5%)          | 156 (39%)    | 155 (38.8%)  | 89 (22.2%)   | 400 (100%)           | 342 (85.5%)       | 52 (13%)         |
| [TRILOGY ACS] <sup>20</sup><br>Roe et al. 2012<br>NEJM<br>[NCT00699998]                           | prasugrel                | 66                      | 2835 (60.8%) | 1758 (37.7%)     | 919 (19.7%)      | 3819 (81.9%)          | 2751 (59.0%)         | 0            | 3283 (70.4%) | 1380 (29.6%) | 1921 (41.2%)         | 0                 | 4663 (100%)      |
|                                                                                                   | clopidogrel              | 66                      | 2840 (60.9%) | 1786 (38.3%)     | 942 (20.2%)      | 3824 (82.0%)          | 2765 (59.3%)         | 0            | 3236 (69.5%) | 1427 (30.6%) | 1930 (41.4%)         | 0                 | 4663 (100%)      |

|                                                                                |             |       |               |            |               |            |            |               |               |          |             |            |          |
|--------------------------------------------------------------------------------|-------------|-------|---------------|------------|---------------|------------|------------|---------------|---------------|----------|-------------|------------|----------|
| [TRITON-TIMI 38] <sup>10</sup><br>Wiviott et al. 2007<br>NEJM<br>[NCT00097591] | prasugrel   | 61    | 5101<br>(75%) | 1567 (23%) | 2350<br>(38%) | 4360 (64%) | 3815 (56%) | 1771<br>(26%) | 5042<br>(74%) | 0        | 6813 (100%) | 6745 (99%) | 68 (1%)  |
|                                                                                | clopidogrel | 61    | 4960<br>(73%) | 1563 (23%) | 2582<br>(38%) | 4349 (64%) | 3805 (56%) | 1767<br>(26%) | 5028<br>(74%) | 0        | 6795 (100%) | 6727 (99%) | 71 (1%)  |
| Tang et al. <sup>17</sup> 2016<br>J Cardiovasc<br>Pharmacol                    | ticagrelor  | 64.36 | 142<br>(71%)  | 58 (29%)   | 116<br>(58%)  | 122 (61%)  | 88 (44%)   | 200<br>(100%) | 0             | 0        | 200 (100%)  | 200 (100%) | 0 (0%)   |
|                                                                                | clopidogrel | 64.18 | 146<br>(73%)  | 42 (21%)   | 124<br>(62%)  | 116 (58%)  | 74 (37%)   | 200<br>(100%) | 0             | 0        | 200 (100%)  | 200 (100%) | 0 (0%)   |
| Wang et al. <sup>18</sup> 2016<br>TCRM                                         | ticagrelor  | 79    | 69 (69%)      | 42 (42%)   | 37 (37%)      | 79 (79%)   | 84 (84%)   | 37 (37%)      | 44 (44%)      | 19 (19%) | 86 (86%)    | 75 (75%)   | 25 (25%) |
|                                                                                | clopidogrel | 80    | 66 (66%)      | 39 (39%)   | 41 (41%)      | 82 (82%)   | 79 (79%)   | 32 (32%)      | 47 (47%)      | 21 (21%) | 83 (83%)    | 71 (71%)   | 29 (29%) |

\* only 2% of patients received prasugrel

ISAR-REACT 5 – Ticagrelor or Prasugrel in Patients with Acute Coronary Syndromes, PHILO – Phase the International Study of Ticagrelor and Clinical Outcomes in Asian ACS Patients, PLATO – PLATElet inhibition and patient Outcomes, PRASFIT-ACS – PRASugrel compared with clopidogrel For Japanese patlenTs with ACS undergoing PCI, TICAKOREA – Ticagrelor Versus Clopidogrel in Asian/Korean Patients with ACS Intended for Invasive Management, TRILOGY ACS – The Targeted Platelet Inhibition to Clarify the Optimal Strategy to Medically Manage Acute Coronary Syndromes, TRITON-TIMI 38 – Trial to Assess Improvement in Therapeutic Outcomes by Optimizing Platelet Inhibition with Prasugrel–Thrombolysis in Myocardial Infarction 38.  
ACS – acute coronary syndrome, JACC – Journal of the American College of Cardiology, NA – not available, NEJM – The New England Journal of Medicine, NSTEMI – non-ST-elevation myocardial infarction, PCI – percutaneous coronary intervention, STEMI – ST-elevation myocardial infarction, TCRM – Therapeutics and Clinical Risk Management, UA – unstable angina

Table V. Bias assessment.

| Study                                                                                           | Selection bias             |                        | Performance bias                       | Detection bias                 | Attrition bias          | Reporting bias      | Other bias |
|-------------------------------------------------------------------------------------------------|----------------------------|------------------------|----------------------------------------|--------------------------------|-------------------------|---------------------|------------|
|                                                                                                 | Random sequence generation | Allocation concealment | Blinding of participants and personnel | Blinding of outcome assessment | Incomplete outcome data | Selective reporting |            |
| [The Elderly ACS II trial] <sup>21</sup> Savonitto et al. 2018 <i>Circulation</i> [NCT01777503] | low                        | low                    | high                                   | low                            | low                     | low                 | low        |
| [ISAR-REACT 5] <sup>11</sup> Schupke et al. 2019 <i>NEJM</i> [NCT01944800]                      | low                        | low                    | high                                   | low                            | low                     | low                 | unclear    |
| [PHILO] <sup>15</sup> Goto et al. 2015 <i>Circulation Journal</i> [NCT01294462]                 | low                        | low                    | low                                    | low                            | low                     | low                 | low        |
| [PLATO] <sup>9</sup> Wallentin et al. 2009 <i>NEJM</i> [NCT00391872]                            | low                        | low                    | low                                    | low                            | low                     | low                 | low        |
| [POPular AGE trial] <sup>14</sup> Maricke et al. 2019 [NCT02317198]                             | low                        | low                    | high                                   | low                            | low                     | low                 | low        |
| [PRAGUE-18] <sup>22</sup> Motovska et al. 2017 <i>JACC</i> [NCT02808767]                        | low                        | low                    | high                                   | low                            | low                     | low                 | low        |
| [The PRASFIT-ACS] <sup>19</sup> Saito et al. 2013 <i>Circulation Journal</i>                    | low                        | unclear                | low                                    | low                            | low                     | low                 | low        |
| [TICAKOREA] <sup>16</sup> Duk-Woo Park et al. 2019 <i>Circulation</i> [NCT02094963]             | low                        | low                    | high                                   | low                            | low                     | low                 | low        |
| [TRILOGY ACS] <sup>20</sup> Roe et al. 2012 <i>NEJM</i> [NCT00699998]                           | low                        | low                    | low                                    | low                            | low                     | low                 | low        |
| [TRITON-TIMI 38] <sup>10</sup> Wiviott et al. 2007 <i>NEJM</i> [NCT00097591]                    | low                        | low                    | low                                    | low                            | low                     | low                 | low        |
| Tang et al. <sup>17</sup> 2016 <i>J Cardiovasc Pharmacol</i>                                    | low                        | unclear                | low                                    | unclear                        | low                     | low                 | low        |
| Wang et al. <sup>18</sup> 2016 <i>TCRM</i>                                                      | low                        | unclear                | low                                    | unclear                        | low                     | low                 | low        |

\* only 2% of patients received prasugrel

ISAR-REACT 5 – Ticagrelor or Prasugrel in Patients with Acute Coronary Syndromes, PHILO – Phase the International Study of Ticagrelor and Clinical Outcomes in Asian ACS Patients, PLATO – PLATelet inhibition and patient Outcomes, PRASFIT-ACS – PRASugrel compared with clopidogrel For Japanese patlenTs with ACS undergoing PCI, TICAKOREA – Ticagrelor Versus Clopidogrel in Asian/Korean Patients with ACS Intended for Invasive Management, TRILOGY ACS – The Targeted Platelet Inhibition to Clarify the Optimal Strategy to Medically Manage Acute Coronary Syndromes, TRITON–TIMI 38 – Trial to Assess Improvement in Therapeutic Outcomes by Optimizing Platelet Inhibition with Prasugrel–Thrombolysis in Myocardial Infarction 38.

JACC – Journal of the American College of Cardiology, NEJM – The New England Journal of Medicine, TCRM – Therapeutics and Clinical Risk Management

Table VI. Exclusion of Trials with open-label design

All-cause mortality

|             |                | HR [95% CI]       |              |                   |                   |
|-------------|----------------|-------------------|--------------|-------------------|-------------------|
| Treatment   | Comparator     | Comparator        | Comparator   | Comparator        | Comparator        |
| Clopidogrel |                | 1.00              |              | 1.06 [0.95, 1.18] | 1.28 [1.15, 1.44] |
| Prasugrel   | vs Clopidogrel | 0.95 [0.85, 1.06] | vs Prasugrel | 1.00              | vs Ticagrelor     |
| Ticagrelor  |                | 0.78 [0.69, 0.87] |              | 0.82 [0.70, 0.97] | 1.00              |

Cardiovascular mortality

|             |                | HR [95% CI]       |              |                   |                   |
|-------------|----------------|-------------------|--------------|-------------------|-------------------|
| Treatment   | Comparator     | Comparator        | Comparator   | Comparator        | Comparator        |
| Clopidogrel |                | 1.00              |              | 1.08 [0.95, 1.23] | 1.28 [1.12, 1.47] |
| Prasugrel   | vs Clopidogrel | 0.92 [0.81, 1.05] | vs Prasugrel | 1.00              | vs Ticagrelor     |
| Ticagrelor  |                | 0.78 [0.68, 0.89] |              | 0.85 [0.74, 1.02] | 1.00              |

Non-cardiovascular mortality

|             |                | HR [95% CI]       |              |                   |                   |
|-------------|----------------|-------------------|--------------|-------------------|-------------------|
| Treatment   | Comparator     | Comparator        | Comparator   | Comparator        | Comparator        |
| Clopidogrel |                | 1.00              |              | 0.97 [0.76, 1.24] | 1.32 [0.92, 1.90] |
| Prasugrel   | vs Clopidogrel | 1.03 [0.81, 1.31] | vs Prasugrel | 1.00              | vs Ticagrelor     |
| Ticagrelor  |                | 0.76 [0.53, 1.09] |              | 0.74 [0.48, 1.14] | 1.00              |

Myocardial infarction

|             |                | HR [95% CI]       |              |                   |                   |
|-------------|----------------|-------------------|--------------|-------------------|-------------------|
| Treatment   | Comparator     | Comparator        | Comparator   | Comparator        | Comparator        |
| Clopidogrel |                | 1.00              |              | 1.18 [0.94, 1.48] | 1.16 [0.85, 1.57] |
| Prasugrel   | vs Clopidogrel | 0.85 [0.68, 1.06] | vs Prasugrel | 1.00              | vs Ticagrelor     |
| Ticagrelor  |                | 0.86 [0.64, 1.17] |              | 1.02 [0.70, 1.49] | 1.00              |

Definite or probable stent thrombosis

|             |                | HR [95% CI]       |              |                   |                   |
|-------------|----------------|-------------------|--------------|-------------------|-------------------|
| Treatment   | Comparator     | Comparator        | Comparator   | Comparator        | Comparator        |
| Clopidogrel |                | 1.00              |              | 2.03 [1.52, 2.70] | 1.35 [1.07, 1.71] |
| Prasugrel   | vs Clopidogrel | 0.49 [0.37, 0.66] | vs Prasugrel | 1.00              | vs Ticagrelor     |
| Ticagrelor  |                | 0.74 [0.59, 0.94] |              | 1.50 [1.04, 2.17] | 1.00              |

Stroke

|             |                | HR [95% CI]       |              |                   |                   |
|-------------|----------------|-------------------|--------------|-------------------|-------------------|
| Treatment   | Comparator     | Comparator        | Comparator   | Comparator        | Comparator        |
| Clopidogrel |                | 1.00              |              | 1.08 [0.85, 1.38] | 0.87 [0.68, 1.11] |
| Prasugrel   | vs Clopidogrel | 0.93 [0.73, 1.18] | vs Prasugrel | 1.00              | vs Ticagrelor     |
| Ticagrelor  |                | 1.15 [0.90, 1.47] |              | 1.24 [0.88, 1.75] | 1.00              |

Major bleeding

|             |                | HR [95% CI]       |              |                   |                   |
|-------------|----------------|-------------------|--------------|-------------------|-------------------|
| Treatment   | Comparator     | Comparator        | Comparator   | Comparator        | Comparator        |
| Clopidogrel |                | 1.00              |              | 0.79 [0.65, 0.97] | 0.96 [0.87, 1.05] |
| Prasugrel   | vs Clopidogrel | 1.26 [1.04, 1.53] | vs Prasugrel | 1.00              | vs Ticagrelor     |
| Ticagrelor  |                | 1.05 [0.95, 1.15] |              | 0.83 [0.67, 1.03] | 1.00              |

\*Only PLATO reported definite stent thrombosis; hence definite stent thrombosis was not estimated.
